# Supplementary material for: Lymphoma cells lacking pro-apoptotic BAX are highly resistant to BH3-mimetics targeting pro-survival MCL-1 but retain sensitivity to conventional DNA-damaging drugs
Source: Springer Nature journal article supplement (doi:10.1038/s41418-023-01117-0), 2023-02-08

Uncropped blots for Figure 1A

TRP53

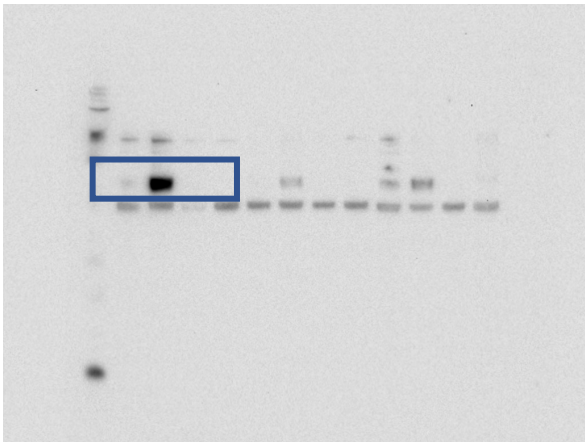

$\beta$ -ACTIN

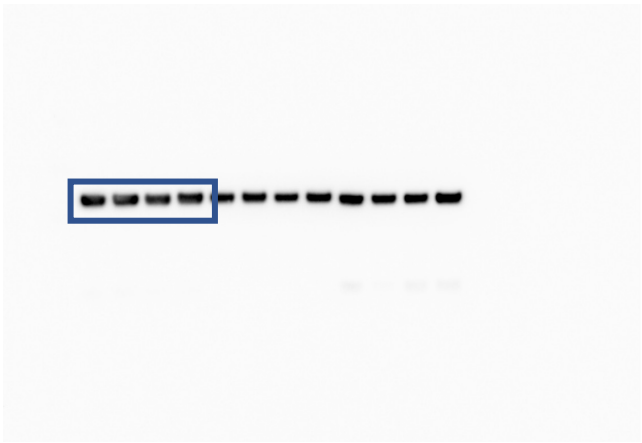

Figure 1 consists of two Western blot panels. The top panel shows a Western blot with 12 lanes. The first 10 lanes are grouped by a blue box. The bottom panel shows a Western blot with 12 lanes. The first 10 lanes are grouped by a blue box. Molecular weight markers are indicated on the right of each panel.

The image displays two gel electrophoresis results. The left gel shows a series of lanes with DNA bands, with a blue box highlighting a specific region. The right gel shows a series of lanes with DNA bands, with a blue box highlighting a specific region.

Uncropped blots for Figure 3C

HSP70

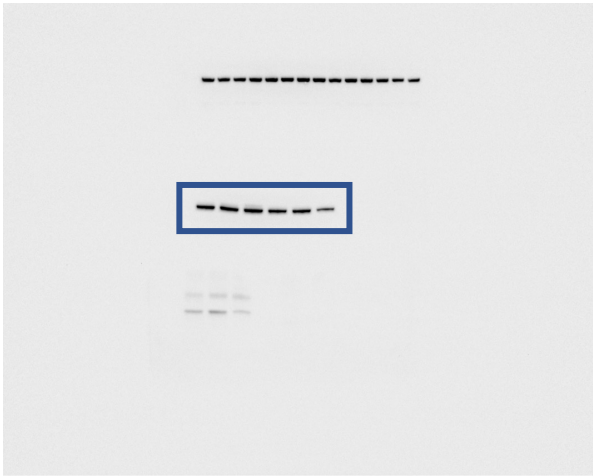

BAX

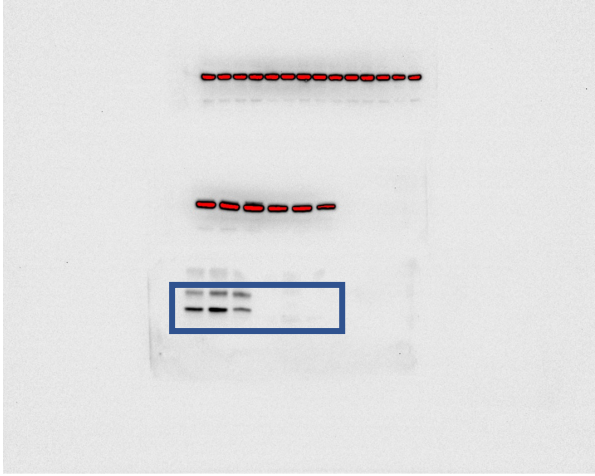

BAK

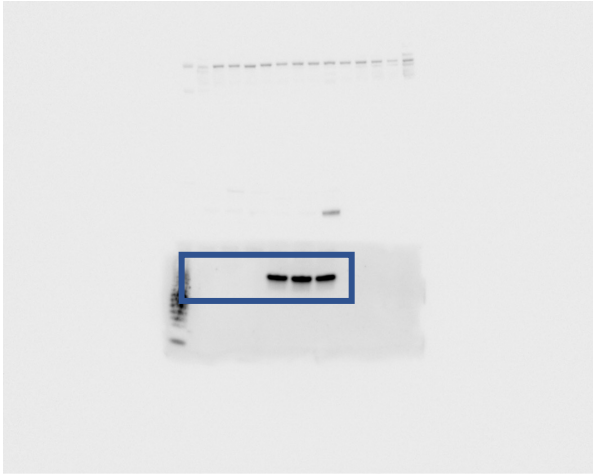

TRP53

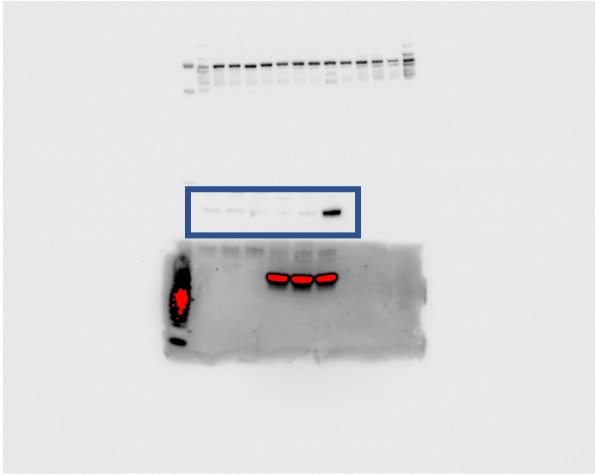

Uncropped blots for Figure 4A

BAK

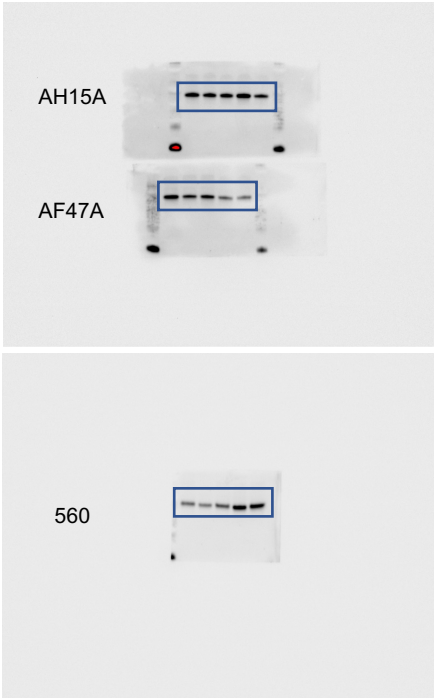

BAX

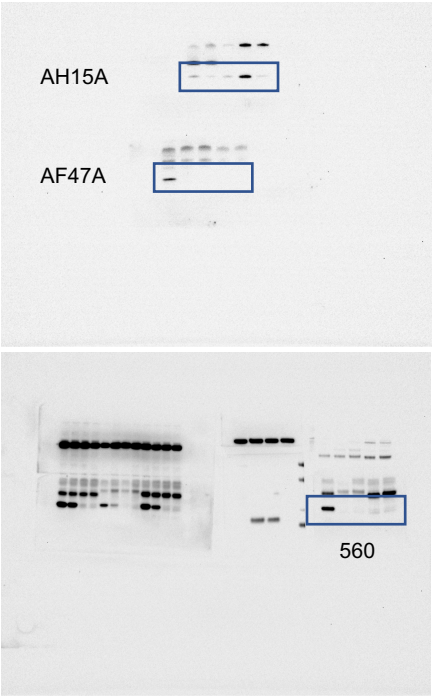

TRP53

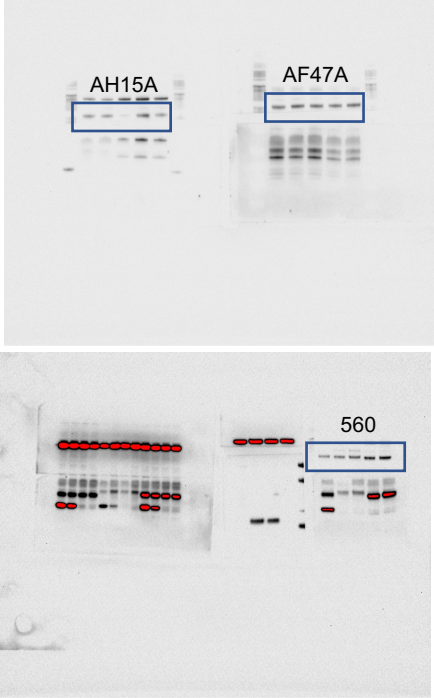

HSP70

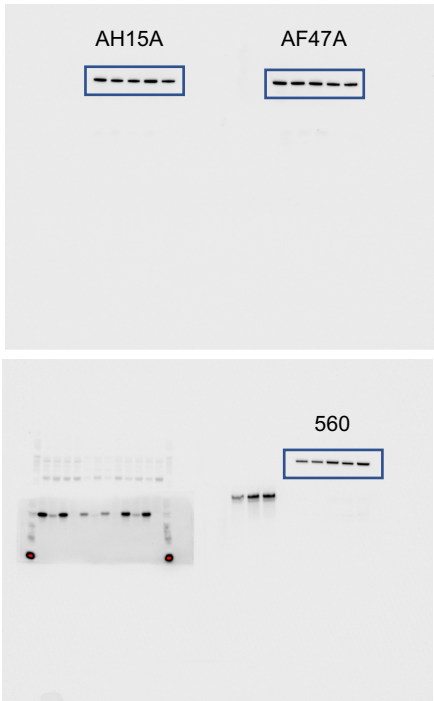

BCL-2

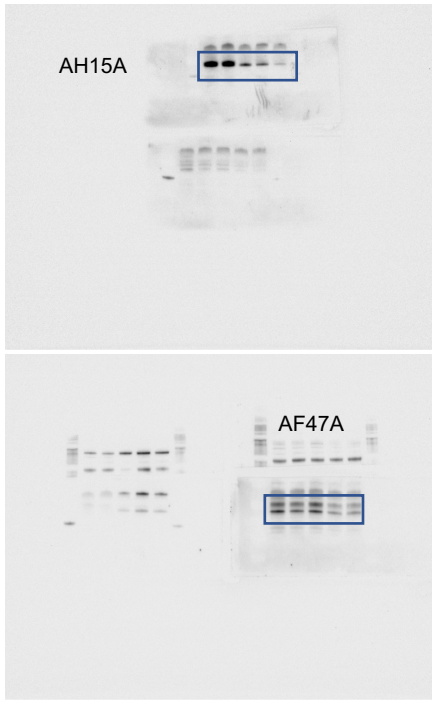

BCL-XL

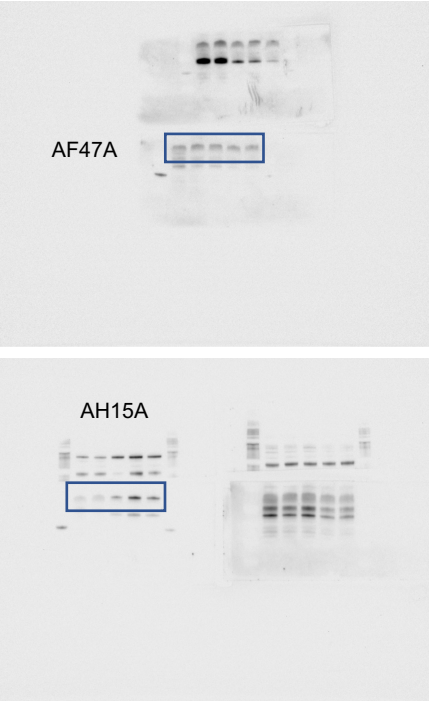

560

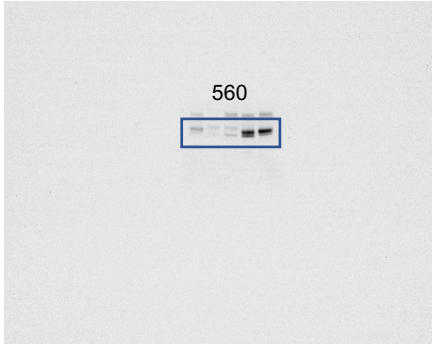

560

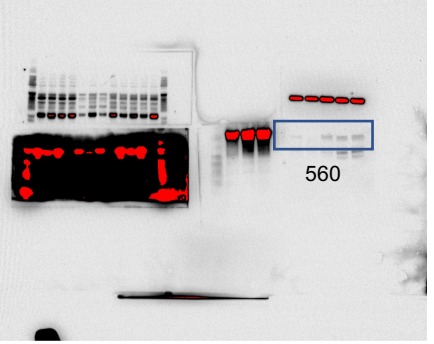

Uncropped blots for Figure 4A

HSP70\*

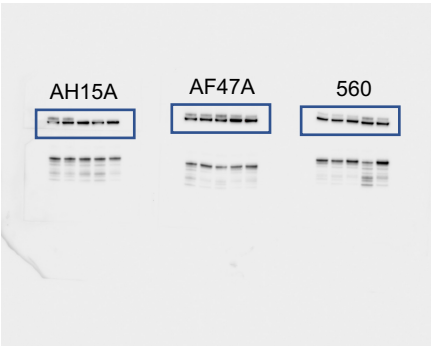

A1

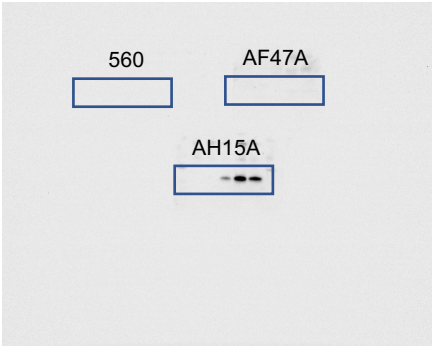

MCL-1

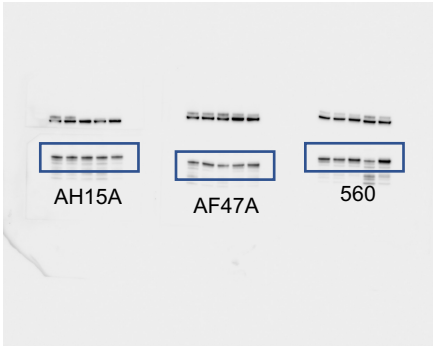

\*Lysates were rerun on a fresh gel for probing with these antibodies. This repeated HSP70 loading control was consistent with the one from the previous gel which is included in the manuscript, therefore this one was not shown in the manuscript.

BIM

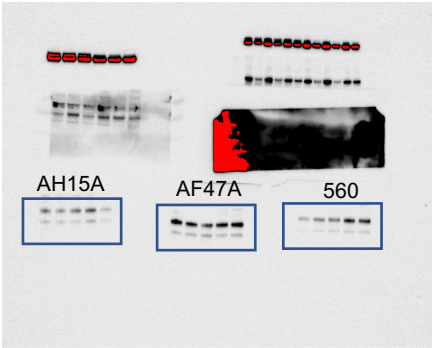

PUMA

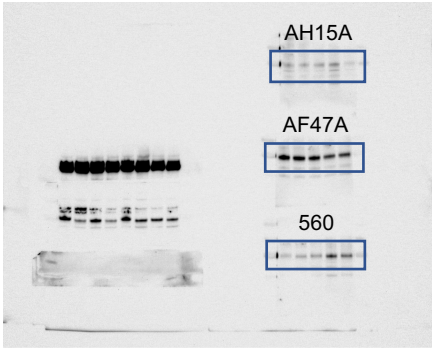



Uncropped blots for Figure 6C

HSP70

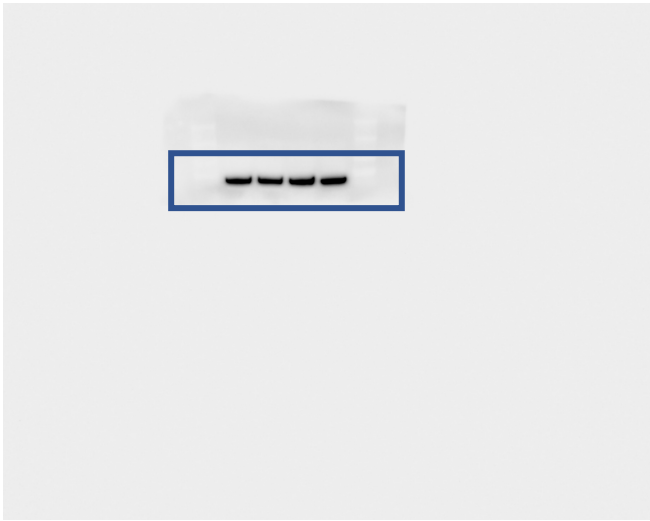

BAX

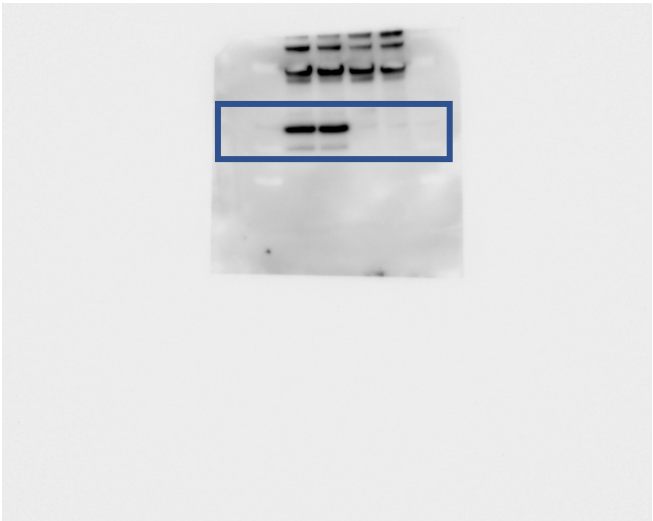

BAK

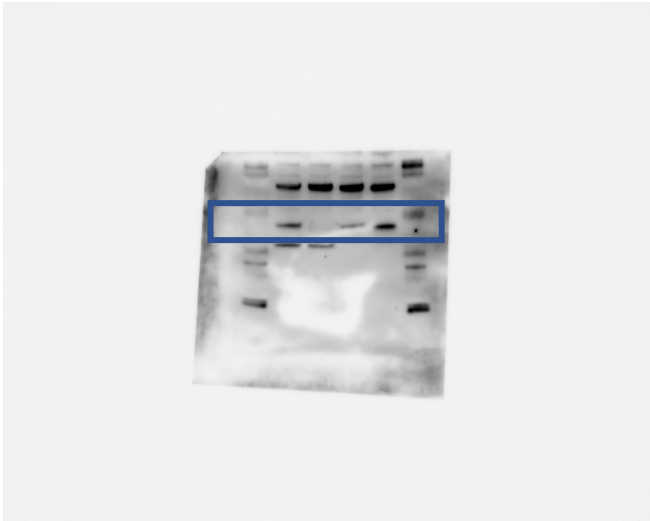

Supplement: MOESM1 [file 41418_2023_1117_MOESM1_ESM.pdf]
